# Supplementary material for: lncRNA MAGI2-AS3 Prevents the Development of HCC via Recruiting KDM1A and Promoting H3K4me2 Demethylation of the RACGAP1 Promoter
Source: PubMed Central journal article supplement — Mol Ther Nucleic Acids. 2019 Aug 28;18:351–62. doi: 10.1016/j.omtn.2019.08.020 (PMC6807294; doi:10.1016/j.omtn.2019.08.020), 2019-08-28
Supplement: mmc1.pdf [file mmc1.pdf]

OMTN, Volume 18

## **Supplemental Information**

### **lncRNA MAGI2-AS3 Prevents the Development of HCC via Recruiting KDM1A and Promoting H3K4me2 Demethylation of the RACGAP1 Promoter**

**Jian Pu, Jianchu Wang, Huamei Wei, Tao Lu, Xianjian Wu, Yi Wu, Zesheng Shao, Chunying Luo, and Yan Lu**

### **Inhibition of MAGI2-AS3 induces proliferation, migration and invasion and inhibits apoptosis of HCCLM3 cells**

RT-qPCR determination presented that the expression of MAGI2-AS3 in HCCLM3 cells decreased after infection with lentivirus expressing sh-MAGI2-AS3 ([Supplementary Figure 1A](#),  $p < 0.05$ ). The results of EdU assay showed that the number of EdU positive cells increased remarkably after MAGI2-AS3 silencing ([Supplementary Figure 1B](#),  $p < 0.05$ ). TUNEL staining showed that the number of apoptotic cells was reduced dramatically after MAGI2-AS3 silencing ([Supplementary Figure 1C](#),  $p < 0.05$ ). Transwell migration and invasion assays showed that the numbers of migrated and invaded cells were elevated after MAGI2-AS3 silencing ([Supplementary Figure 1D](#) and [1E](#),  $p < 0.05$ ). These results suggest that knockdown of MAGI2-AS3 could accelerate the proliferating, migrating and invading capabilities but inhibit apoptosis of HCCLM3 cells.

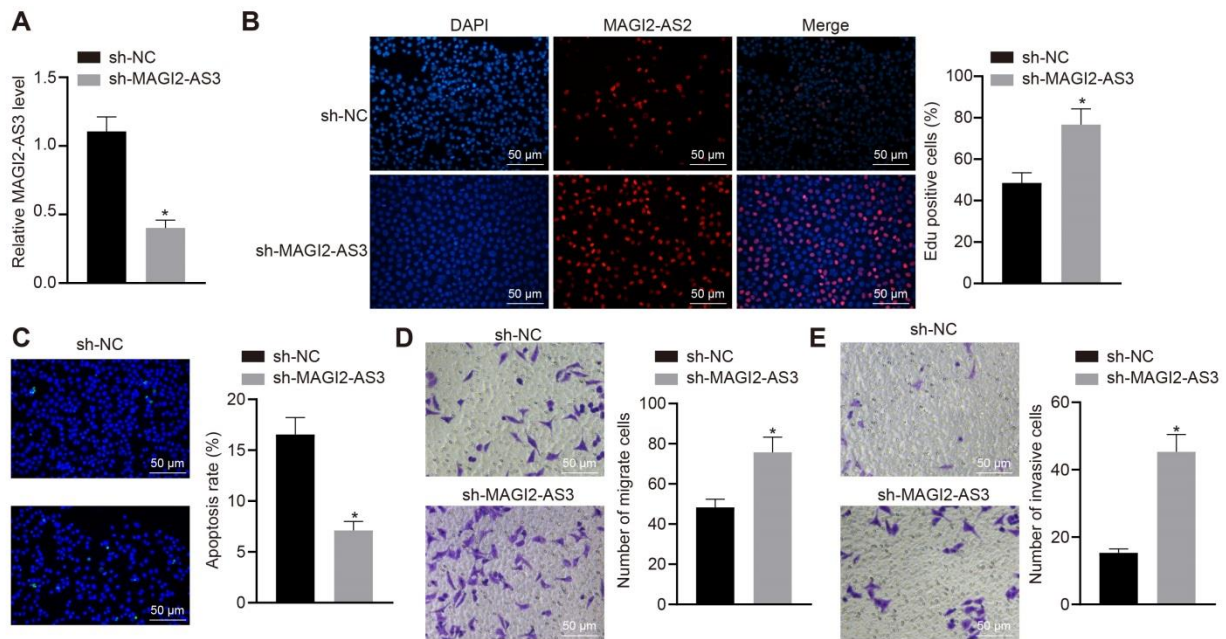

**Supplementary Figure 1.** Suppression of MAGI2-AS3 enhances the proliferative, migrating and invading HCCLM3 cells but reduce apoptotic HCCLM3 cells. HCCLM3 cells were infected with lentivirus harboring sh-MAGI2-AS3 or sh-NC. (A) The expression of MAGI2-AS3 was determined by RT-qPCR following infection. (B) The proliferation of HCCLM3 cells was evaluated by EdU staining following infection ( $\times 200$ ). (C) TUNEL staining assessed the apoptosis of HCCLM3 cells following infection ( $\times 200$ ). (D, E) Cell migration and invasion assessed by Transwell assay ( $\times 200$ ). The experiments were repeated 3 times independently; \*  $p < 0.05$ , vs. the sh-NC group, data were analyzed using unpaired  $t$ -test.

**Supplementary Table 1** Associations between MAGI2-AS3 expression and characteristics of HCC patients

| Characteristics        | Patients (n = 70) | MAGI2-AS3     | <i>p</i> |
|------------------------|-------------------|---------------|----------|
| Age (years)            |                   |               | 0.212    |
| ≤ 50                   | 31                | 0.326 ± 0.037 |          |
| > 50                   | 27                | 0.311 ± 0.053 |          |
| Gender                 |                   |               | 0.716    |
| Male                   | 49                | 0.318 ± 0.043 |          |
| Female                 | 9                 | 0.324 ± 0.057 |          |
| Tumor size (cm)        |                   |               | 0.023    |
| ≥ 5                    | 12                | 0.293 ± 0.058 |          |
| < 5                    | 46                | 0.326 ± 0.039 |          |
| TNM stage              |                   |               | 0.048    |
| I                      | 16                | 0.341 ± 0.034 |          |
| II                     | 24                | 0.316 ± 0.045 |          |
| III                    | 18                | 0.304 ± 0.048 |          |
| Cirrhosis              |                   |               | 0.764    |
| Yes                    | 16                | 0.322 ± 0.055 |          |
| No                     | 42                | 0.318 ± 0.041 |          |
| Hepatitis (HBV or HCV) |                   |               | 0.246    |
| Negative               | 32                | 0.325 ± 0.049 |          |
| Positive               | 26                | 0.311 ± 0.040 |          |
| Lymph node metastasis  |                   |               | < 0.001  |
| Yes                    | 19                | 0.270 ± 0.032 |          |
| No                     | 39                | 0.343 ± 0.028 |          |

Notes: HCC, hepatocellular carcinoma; TNM, tumor lymph node metastasis; HBV, hepatitis B virus; HCV, hepatitis C virus.

**Supplementary Table 2** Primer sequences for RT-qPCR

| Gene           | Sequence                                                        |
|----------------|-----------------------------------------------------------------|
| MAGI2-AS3      | F: 5'-CACCTTGCTTGACAACCTTGA-3'<br>R: 5'-CATTACAGCTCGGCTACTGC-3' |
| $\beta$ -actin | F: 5'-GGGACCCTTCAGAACCAA-3'<br>R: 5'-TAGCCTGATGCTCGAATCCT-3'    |
| RACGAP1        | F: 5'-TGATGGTGGAGCAAGAG-3'<br>R: 5'-GGGAAGTAACAGGCAGAT-3'       |

Notes: RT-qPCR, reverse transcription-quantitative polymerase chain reaction; MAGI2-AS3, MAGI2 antisense RNA 3; RACGAP1, Rac GTPase-activating protein 1; F, forward; R, reverse.
